# Supplementary material for: Human Placenta Exosomes: Biogenesis, Isolation, Composition, and Prospects for Use in Diagnostics
Source: MDPI journal article supplement (doi:10.3390/ijms22042158), 2021-02-22
Supplement: s1 [file s1]

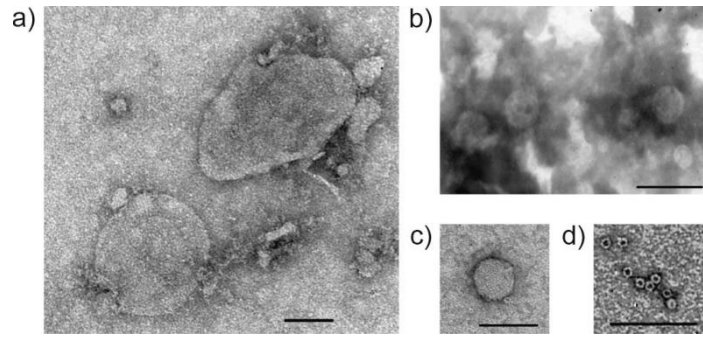

**Figure S1.** Structural components of the exosomes preparations after differential centrifugation. Transmission electron microscopy, negative staining. (a) Large membrane structures having a diameter of more than 100 nm; (b) aggregated proteins and small vesicles; (c) “non-vesicles”; (d) ferritin. The length of the scale bar is corresponding to 100 nm.

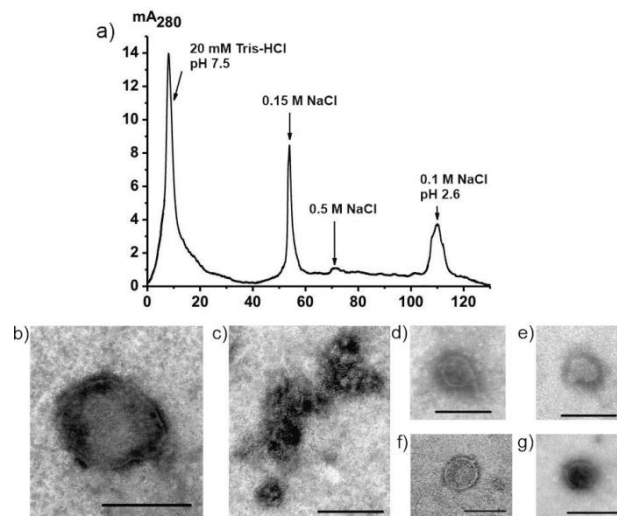

**Figure S2.** (a) Affinity chromatography of the exosome preparations on anti-CD81-Sepharose, elution conditions are indicated in the picture, (—) absorbance at 280 nm ( $mA_{280}$ ). (b–g) Structural components of exosomes preparations after affinity chromatography: fraction eluted with 20 mM Tris-HCl pH 7.5 contains large vesicles (b) and aggregated proteins (c); fraction eluted with 0.15 M NaCl contains exosomes (d, f); fraction eluted with 0.1 M Gly-HCl pH 2.6 contains small amount exosomes (g) and “non-vesicles” (e). Transmission electron microscopy, negative staining. The length of the scale bar scale corresponds to 200 nm (b) and 100 nm (c–g).
